# Supplementary material for: Munc18-1 domain-1 controls vesicle docking and secretion by interacting with syntaxin-1 and chaperoning it to the plasma membrane
Source: PubMed Central journal article supplement — Mol Biol Cell. 2011 Nov 1;22(21):4134–49. doi: 10.1091/mbc.E11-02-0135 (PMC3204074; doi:10.1091/mbc.e11-02-0135), 2011-11-01
Supplement: supp_E11-02-0135_CombinedSupMats.pdf [file supp_E11-02-0135_CombinedSupMats.pdf]

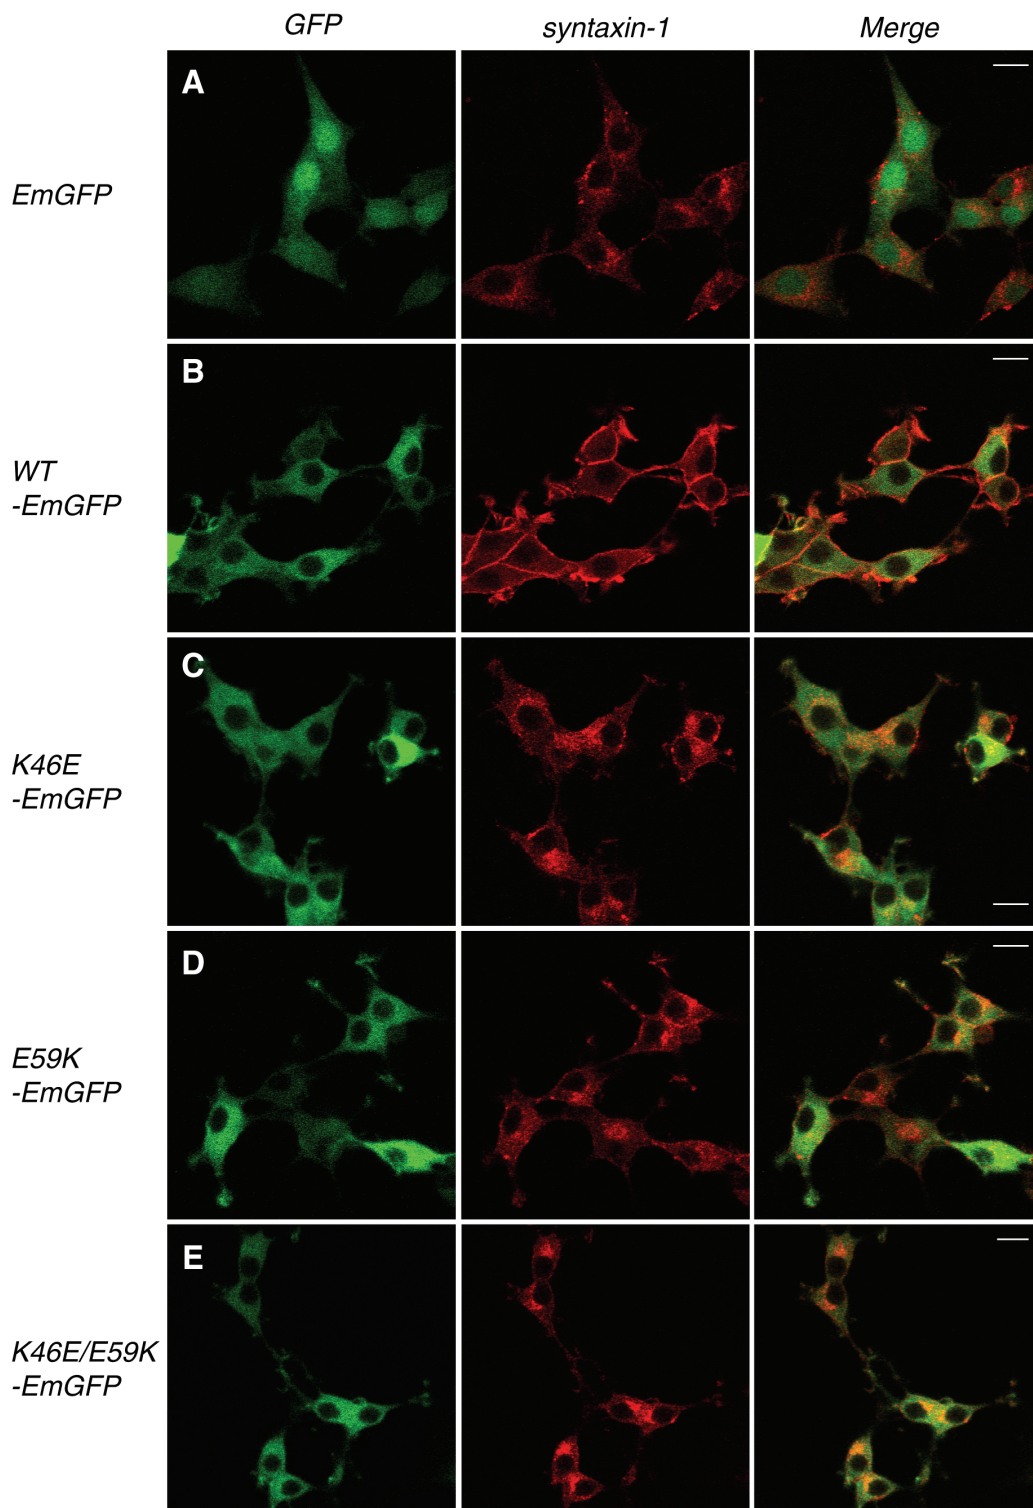

Supplemental Figure 1

Han et al.

**Supplemental Figure 1. Differential rescue of syntaxin-1 localization in Munc18-1/-2 double knockdown clone (D7) upon reintroduction of Munc18-1 variants.** Confocal images of D7 cells infected with lentiviruses that express (A) negative control EmGFP alone, (B) wild-type Munc18-1-EmGFP, (C) K46E-EmGFP, (D) E59K-EmGFP and (E) K46E/E59K-EmGFP (left). These cells were stained with anti-syntaxin-1 antibodies followed by red-x-conjugated anti-mouse antibodies (middle). Right panels are merged pictures. Bar, 10  $\mu$ m.

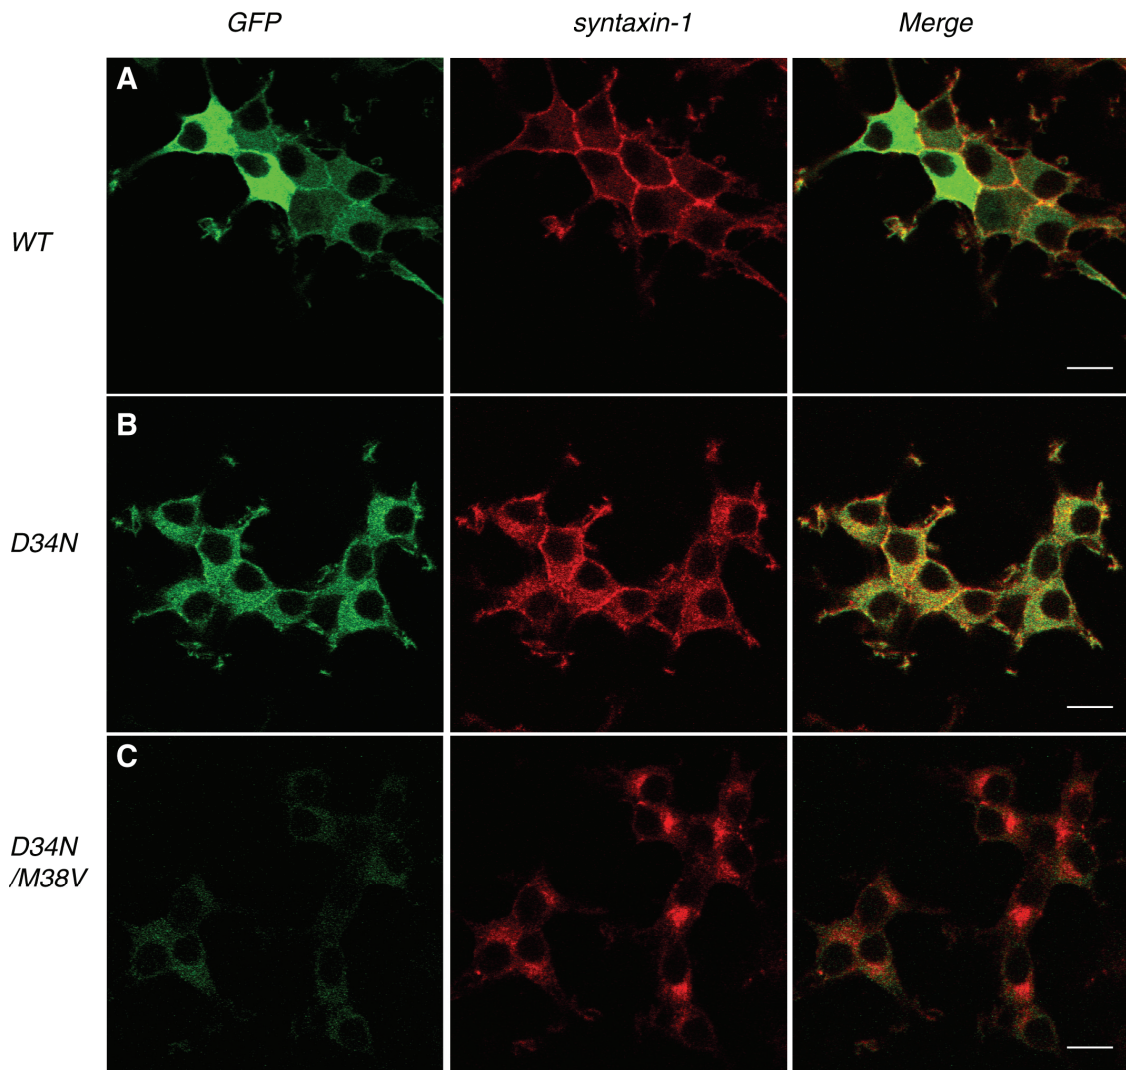

Supplemental Figure 2

Han et al.

**Supplemental Figure 2. Syntaxin-1 localization in Munc18-1/-2 double knockdown clone (D7) upon reintroduction of D34N and D34N/M38V Munc18-1 variants.**

Confocal images of D7D16 cells infected with lentiviruses that express (A) wild-type Munc18-1-EmGFP, (B) D34N-EmGFP, and (C) D34N/M38V-EmGFP (left). These cells were stained with anti-syntaxin-1 antibodies followed by red-x-conjugated anti-mouse antibodies (middle). Right panels are merged. Bar, 10  $\mu$ m.
